# Supplementary material
Source: PubMed Central journal article supplement (PMC7971691)
Supplement: NIHMS1670664-supplement-1.pdf [file NIHMS1670664-supplement-1.pdf]

Title: High intensity VNS disrupts VNS-mediated plasticity in motor cortex

Authors: Robert A. Morrison<sup>1,2,\*</sup>, Tanya T. Danaphongse<sup>2</sup>, Stephanie T. Abe<sup>2</sup>, Madison E. Stevens<sup>2</sup>, Vikram Ezhil<sup>1,2</sup>, Armin Seyedahmadi<sup>2</sup>, Katherine S. Adcock<sup>1,2</sup>, Robert L. Rennaker<sup>1,2</sup>, Michael P. Kilgard<sup>1,2</sup>, Seth A. Hays<sup>1,2,3</sup>

**Affiliations:**

<sup>1</sup> The University of Texas at Dallas, School of Behavioral Brain Sciences, Richardson, TX.

<sup>2</sup> The University of Texas at Dallas, Texas Biomedical Device Center, Richardson, TX.

<sup>3</sup> The University of Texas at Dallas, Erik Jonsson School of Engineering and Computer Science, Richardson, TX.

\* Correspondence to: robert.morrison@utdallas.edu

Supplementary Material:

S1 – Raw maps from ICMS

(A) Sham

(B) Standard VNS

(C) Interleaved VNS

(D) Short VNS

A)

Sham

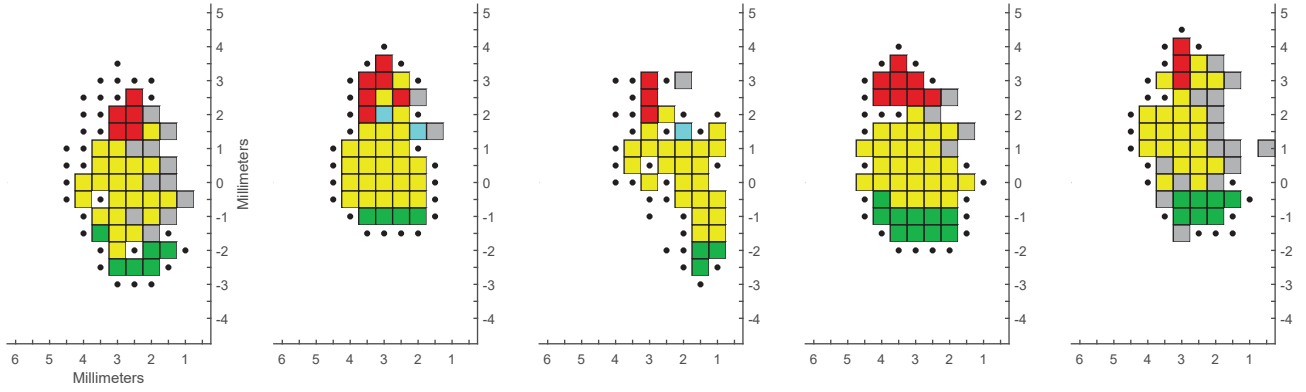

B)

Standard  
VNS

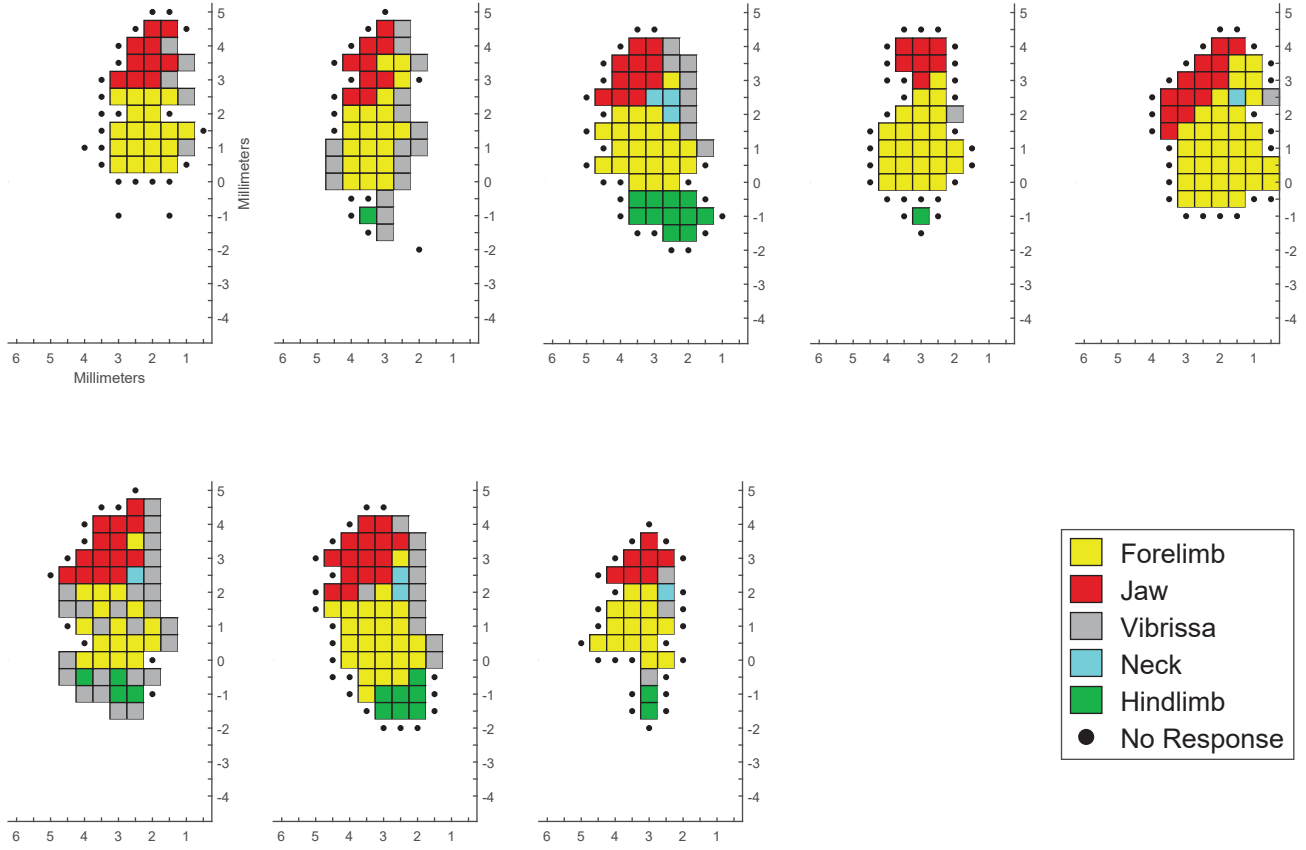

C)

Interleaved  
VNS

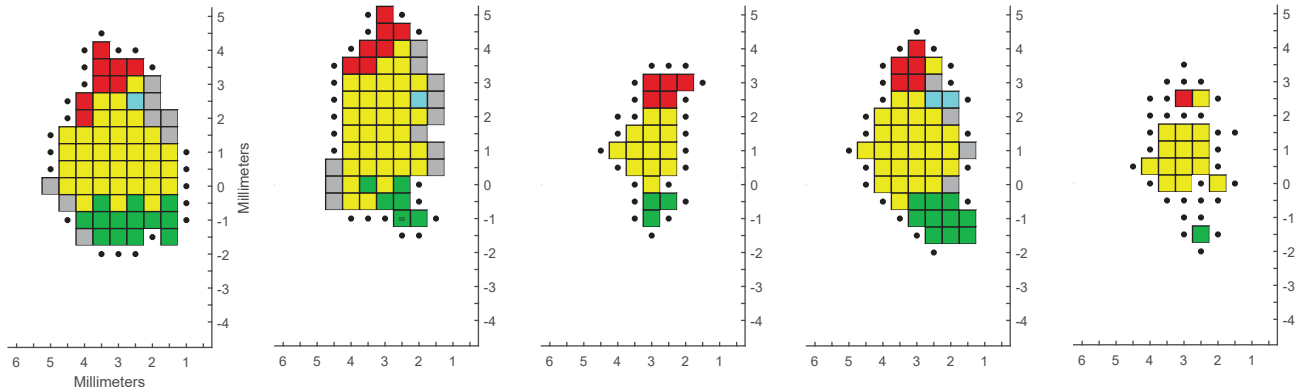

D)

Short  
VNS

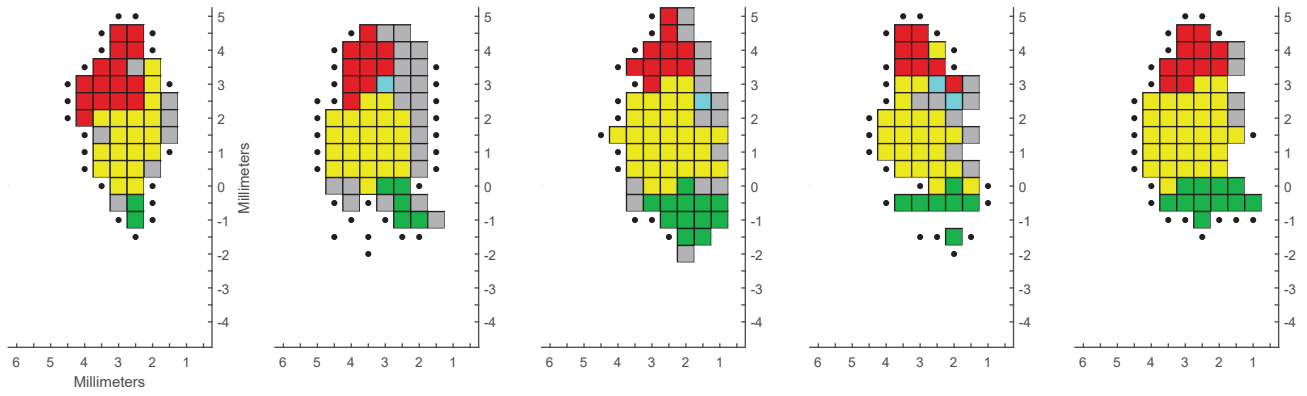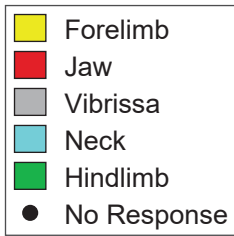

**Figure S1. Raw Maps from ICMS**

Axes denote stereotaxic coordinates relative to bregma with rostro-caudal directions from +5 to -4 mm and mediolateral directions from 0 to +6 mm.

- (A) Sham
- (B) Standard VNS
- (C) Interleaved VNS
- (D) Short VNS
